# Supplementary material
Source: publisher figshare collection journal article supplement (https://karger.figshare.com/articles/dataset/_/7223243)
Supplement: Supplementary file 1 [file 1]

Supplement Distribution of participants and tests across centers in the 'BEAM' trial.

| Tests             | Measurements              | Subjects                | Center 1      |              | Center 2     |              | Center 3           |              |
|-------------------|---------------------------|-------------------------|---------------|--------------|--------------|--------------|--------------------|--------------|
|                   |                           |                         | Groningen, NL |              | Potsdam, GE  |              | Ribeirão Preto, BR |              |
|                   |                           | Age groups, y           | M             | F            | M            | F            | M                  | F            |
|                   |                           | 1. 20-29                | 6             | 6            | 6            | 6            | 6                  | 6            |
|                   |                           | 2. 30-39                | 6             | 6            | 6            | 6            | 6                  | 6            |
|                   |                           | 3. 40-49                | 6             | 6            | 6            | 6            | 6                  | 6            |
|                   |                           | 4. 50-59                | 6             | 6            | 6            | 6            | 6                  | 6            |
|                   |                           | 5. 60-69                | 10            | 10           | 10           | 10           | 10                 | 10           |
|                   |                           | 6. 70-79                | 10            | 10           | 10           | 10           | 10                 | 10           |
|                   |                           | 7. 80+                  | 10            | 10           | 10           | 10           | 10                 | 10           |
|                   |                           | Total                   | 54            | 54           | 54           | 54           | 54                 | 54           |
| 1                 | Demographics              | Measured in age groups: | 1 to 7        | 1 to 7       | 1 to 7       | 1 to 7       | 1 to 7             | 1 to 7       |
|                   | Physical activity         | Measured in age groups: | 1 to 7        | 1 to 7       | 1 to 7       | 1 to 7       | 1 to 7             | 1 to 7       |
|                   | Fall fear / history       | Measured in age groups: | 4 to 7        | 4 to 7       | 4 to 7       | 4 to 7       | 4 to 7             | 4 to 7       |
|                   | Functional tests          |                         |               |              |              |              |                    |              |
|                   | Mini BESTest              | Measured in age groups: | 4 to 7        | 4 to 7       | 4 to 7       | 4 to 7       | 4 to 7             | 4 to 7       |
|                   | Mobility, SPPB            | Measured in age groups: | 1 to 7        | 1 to 7       | 1 to 7       | 1 to 7       | 1 to 7             | 1 to 7       |
|                   | Static balance            | Measured in age groups: | 1 to 7        | 1 to 7       | 1 to 7       | 1 to 7       | 1 to 7             | 1 to 7       |
|                   | Proactive balance (Reach) | Measured in age groups: | 4 to 7        | 4 to 7       | 4 to 7       | 4 to 7       | 4 to 7             | 4 to 7       |
|                   | Proactive balance (TUG)   | Measured in age groups: | 4 to 7        | 4 to 7       | 4 to 7       | 4 to 7       | 4 to 7             | 4 to 7       |
|                   | Reactive balance          | Measured in age groups: | 4 to 7        | 4 to 7       | 4 to 7       | 4 to 7       | 4 to 7             | 4 to 7       |
|                   | Dynamic balance (beam)    | Measured in age groups: | 1 to 7        | 1 to 7       | 1 to 7       | 1 to 7       | 1 to 7             | 1 to 7       |
|                   | Grip strength             | Measured in age groups: | 1 to 7        | 1 to 7       | 1 to 7       | 1 to 7       | 1 to 7             | 1 to 7       |
|                   | Leg strength              | Measured in age groups: | 1 to 7        | 1 to 7       | 1 to 7       | 1 to 7       | 1 to 7             | 1 to 7       |
|                   | Cognitive tests           |                         |               |              |              |              |                    |              |
|                   | Global cognition          | Measured in age groups: | 1 to 7        | 1 to 7       | 1 to 7       | 1 to 7       | 1 to 7             | 1 to 7       |
|                   | Attention, executive f.   | Measured in age groups: | 1 to 7        | 1 to 7       | 1 to 7       | 1 to 7       | 1 to 7             | 1 to 7       |
|                   | Processing speed          | Measured in age groups: | 1 to 7        | 1 to 7       | 1 to 7       | 1 to 7       | 1 to 7             | 1 to 7       |
|                   | Memory                    | Measured in age groups: | 1 to 7        | 1 to 7       | 1 to 7       | 1 to 7       | 1 to 7             | 1 to 7       |
| 2 (Re-test)       | Dynamic balance (beam)    | 1 and 4 to 7            | 5             | 5            | 5            | 5            | 5                  | 5            |
| Follow-up, months |                           |                         |               |              |              |              |                    |              |
| 6                 | Fall fear / history       | 4 to 7                  | As available  | As available | As available | As available | As available       | As available |
| 12                | Fall fear / history       | 4 to 7                  | As available  | As available | As available | As available | As available       | As available |
