# Supplementary material
Source: publisher figshare collection journal article supplement (https://karger.figshare.com/articles/dataset/_/7223243)

A

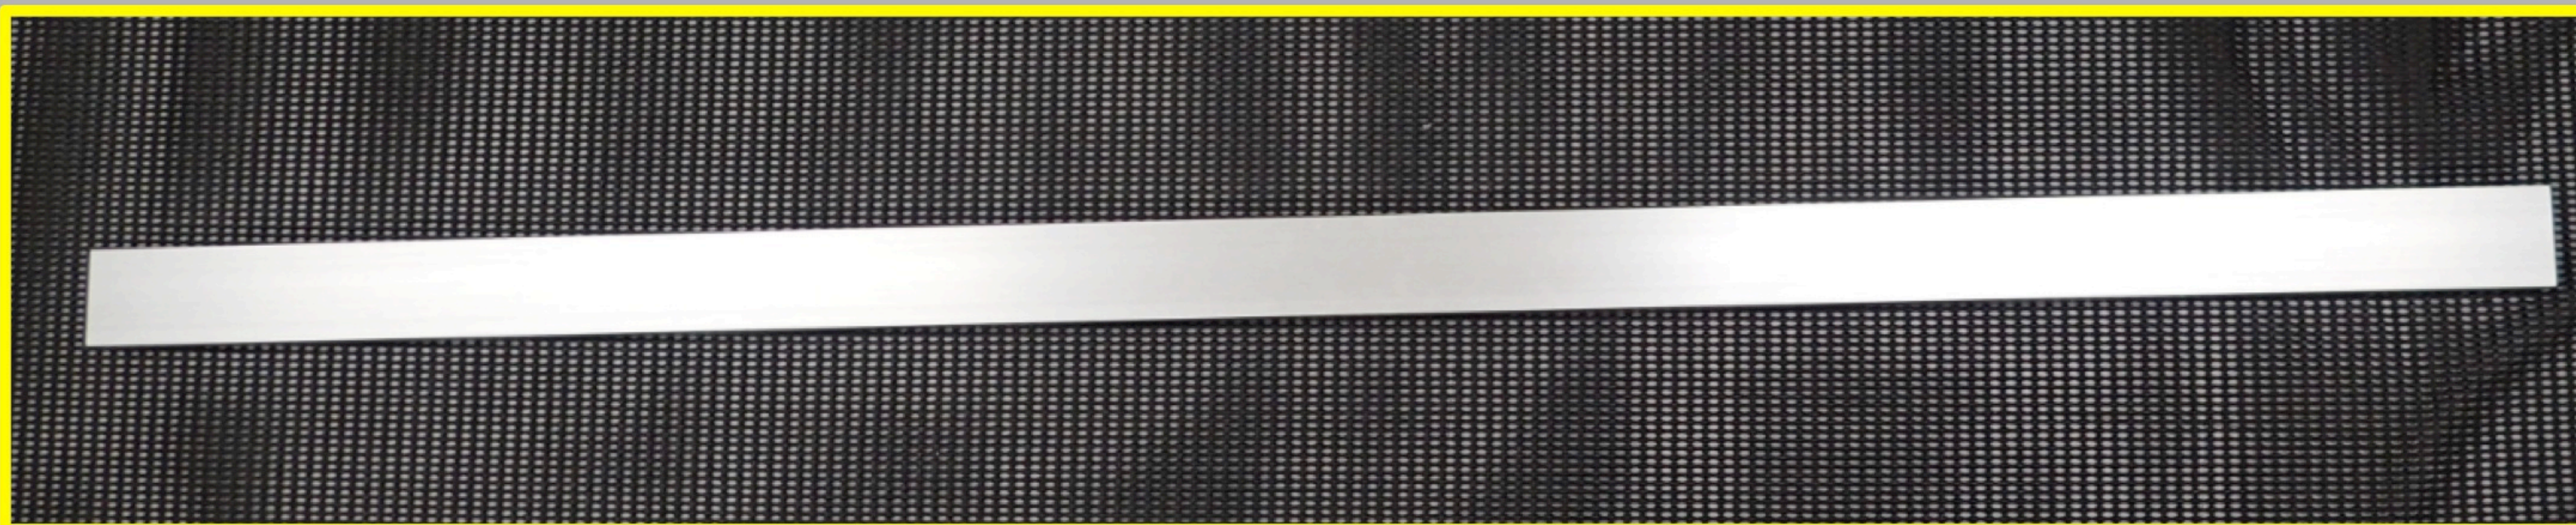

B

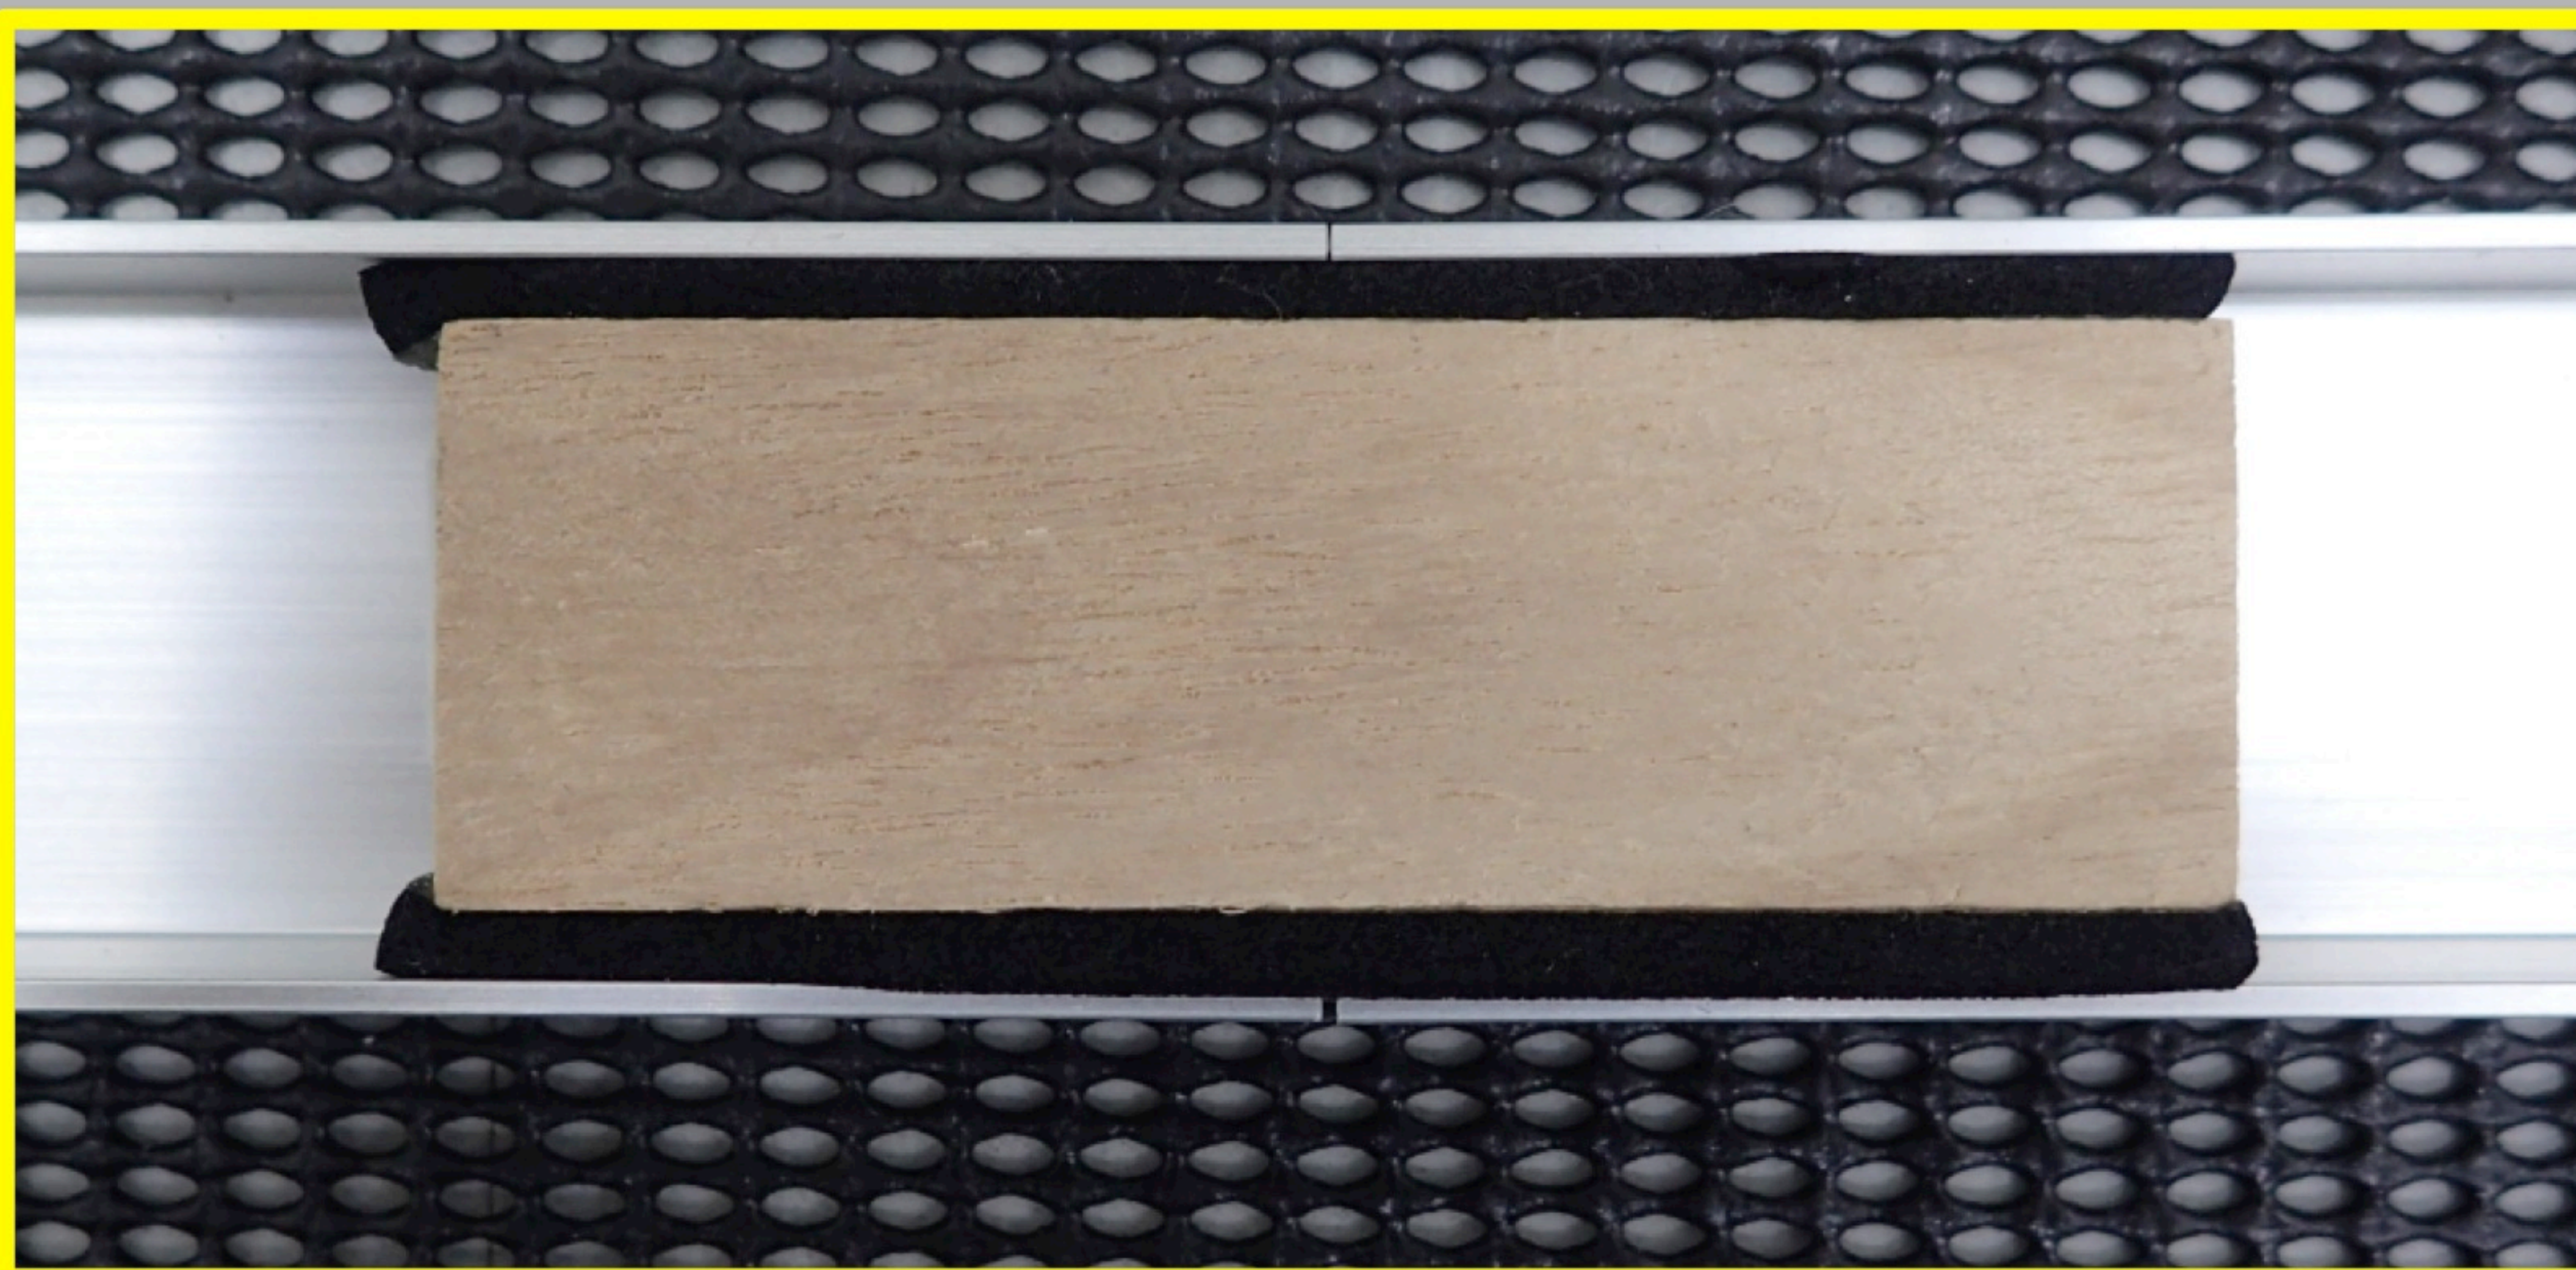

C

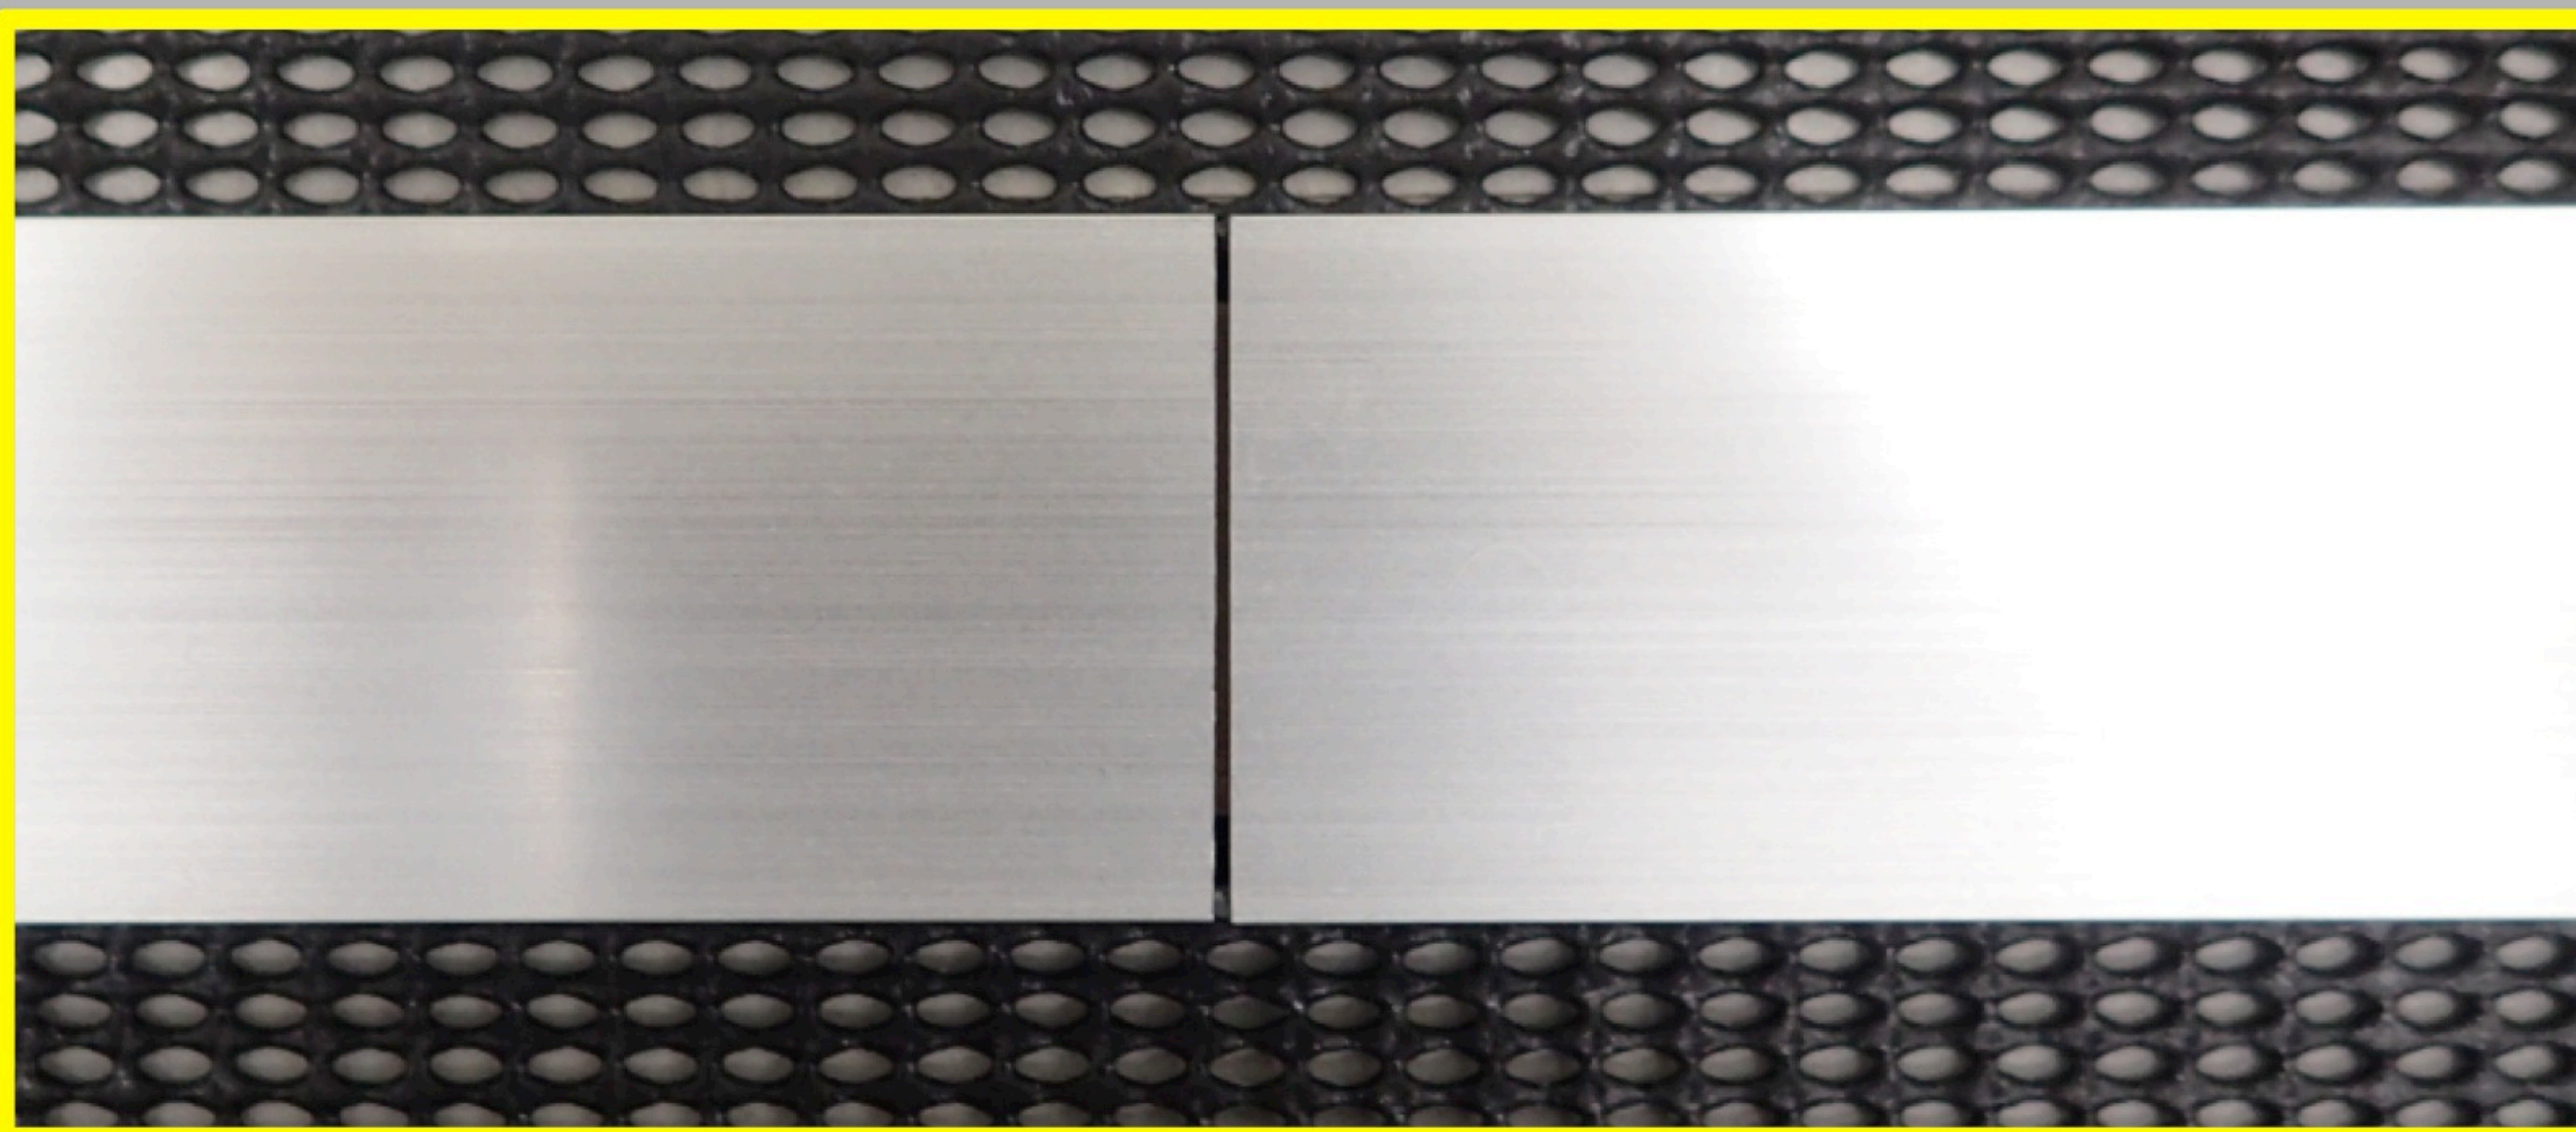

Supplement: Supplementary file 3 [file 1]
